# Supplementary material for: A rapid dispersive liquid–liquid microextraction of antimicrobial onion organosulfur compounds in animal feed coupled to gas chromatography-mass spectrometry
Source: Royal Society of Chemistry journal article supplement (doi:10.1039/d0ay00632g), 2020-01-01
Supplement: d0ay00632g1.pdf [file d0ay00632g1.pdf]

## ELECTRONIC SUPPLEMENTARY INFORMATION

### **A rapid dispersive liquid-liquid microextraction of antimicrobial onion organosulfur compounds in animal feed coupled to gas chromatography-mass spectrometry**

**Marta Pastor-Belda<sup>1</sup>, Natalia Arroyo-Manzanares<sup>1\*</sup>, Kateryna Yavir<sup>2</sup>, Paloma Abad<sup>3</sup>, Natalia Campillo<sup>1</sup>, Manuel Hernández-Córdoba<sup>1</sup>, Pilar Viñas<sup>1\*</sup>**

*<sup>1</sup> Department of Analytical Chemistry, Faculty of Chemistry, Regional Campus of International Excellence "Campus Mare Nostrum", University of Murcia, E-30100 Murcia, Spain*

*<sup>2</sup> Department of Physical Chemistry, Faculty of Chemistry, Gdansk University of Technology (GUT), 11/12 G. Narutowicza St., 80-233 Gdańsk 80-233 Poland*

*<sup>3</sup> DMC Research Center S.L.U., Camino de Jayena no. 82, E-18620 Alhendín, Spain*

\*Corresponding author:

Prof. Pilar Viñas

Department of Analytical Chemistry

Faculty of Chemistry

University of Murcia

E-30100 Murcia

SPAIN

Tel.: +34 868887415

FAX: +34 868887682

e-mail: [pilarvi@um.es](mailto:pilarvi@um.es)

Table ESI1

Relative standard deviations for the different methodologies

| Procedure | Concentration,<br>$\mu\text{g g}^{-1}$ | Repeatability <sup>a</sup> , %RSD |      | Reproducibility <sup>b</sup> , %RSD |      |
|-----------|----------------------------------------|-----------------------------------|------|-------------------------------------|------|
|           |                                        | PDS                               | PTSO | PDS                                 | PTSO |
| DSPE      | 0.5                                    | 14                                | 16   | 17                                  | 22   |
|           | 5                                      | 15                                | 14   | 19                                  | 15   |
| DLLME     | 0.1                                    | 9.7                               | 13   | 10                                  | 13   |
|           | 2                                      | 9.5                               | 11   | 9.8                                 | 11   |

a. n=9

b. n=15 (3 days)

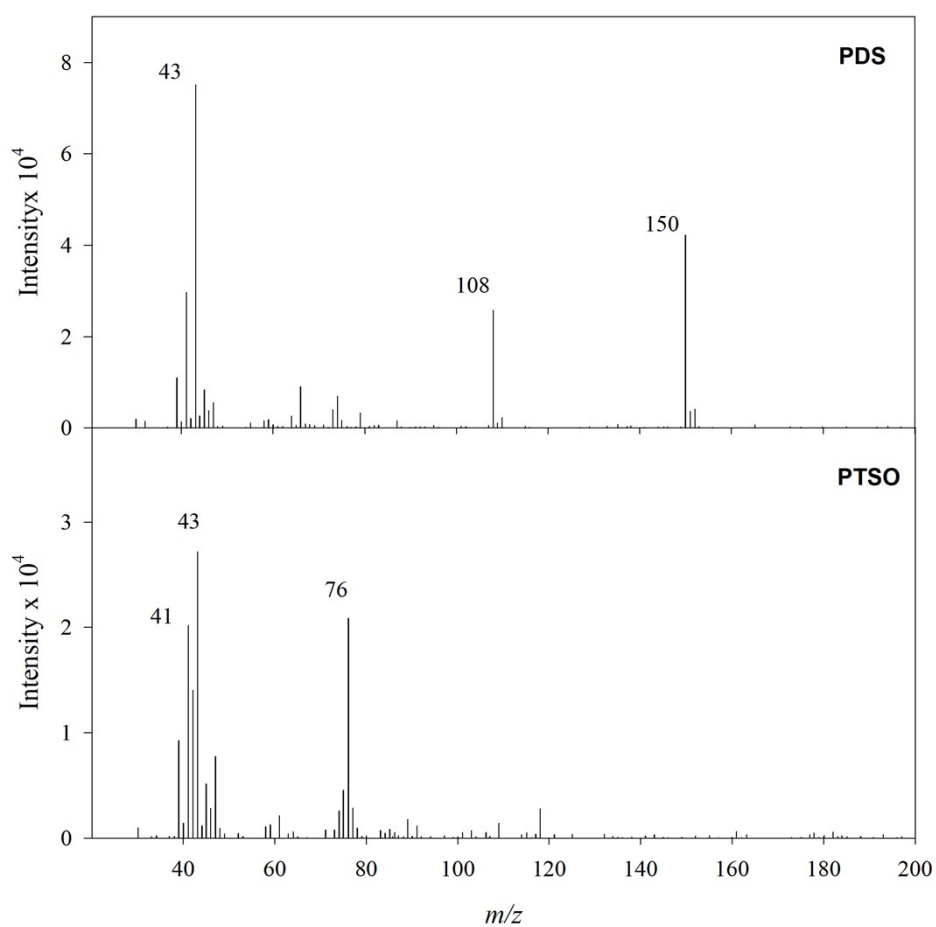**Fig. ESI1** Mass spectra of organosulfur compounds, PDS and PTSO

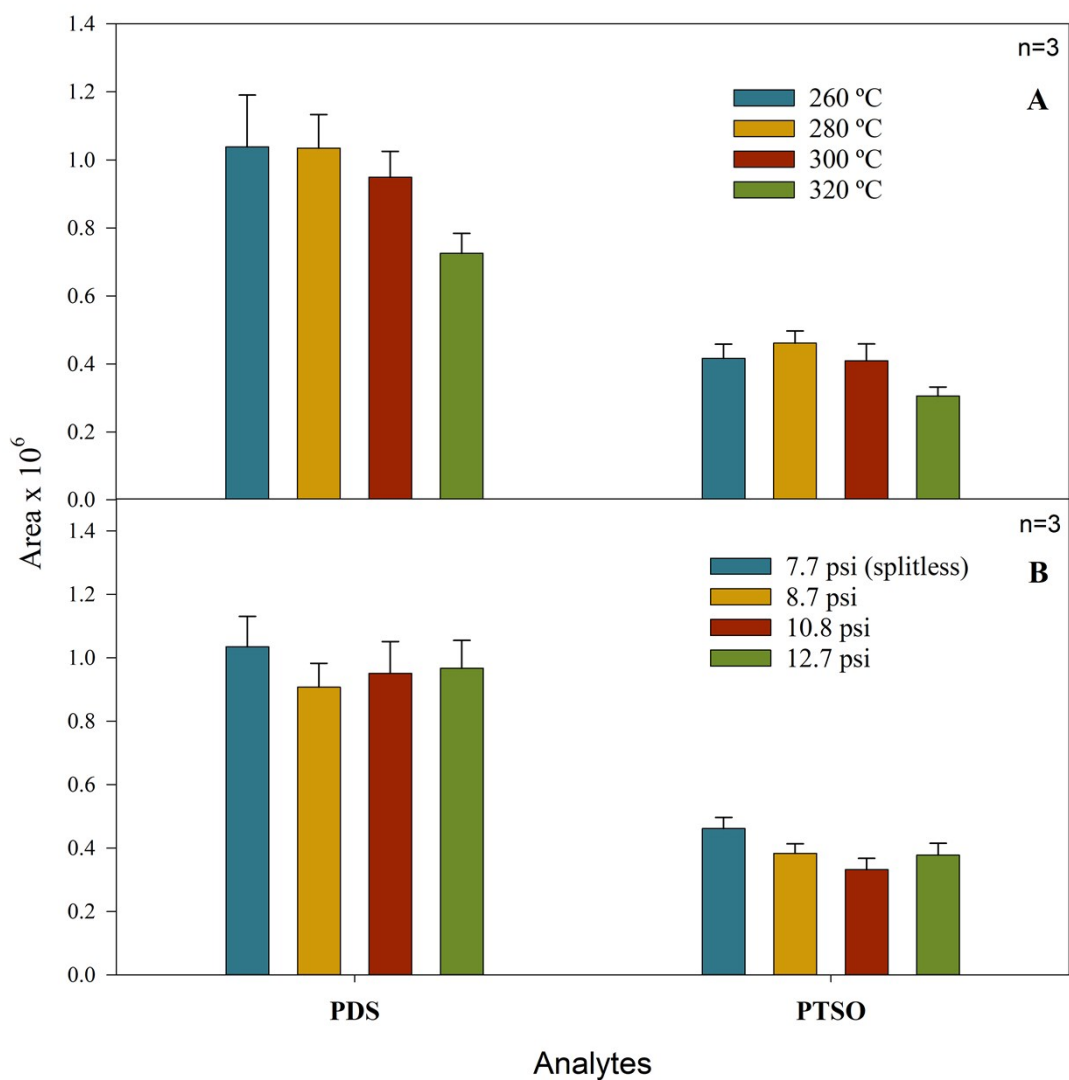

**Fig. ESI2** Optimization of the GC injection: A. Inlet temperature; B: Inlet pressure during the first 0.5 min

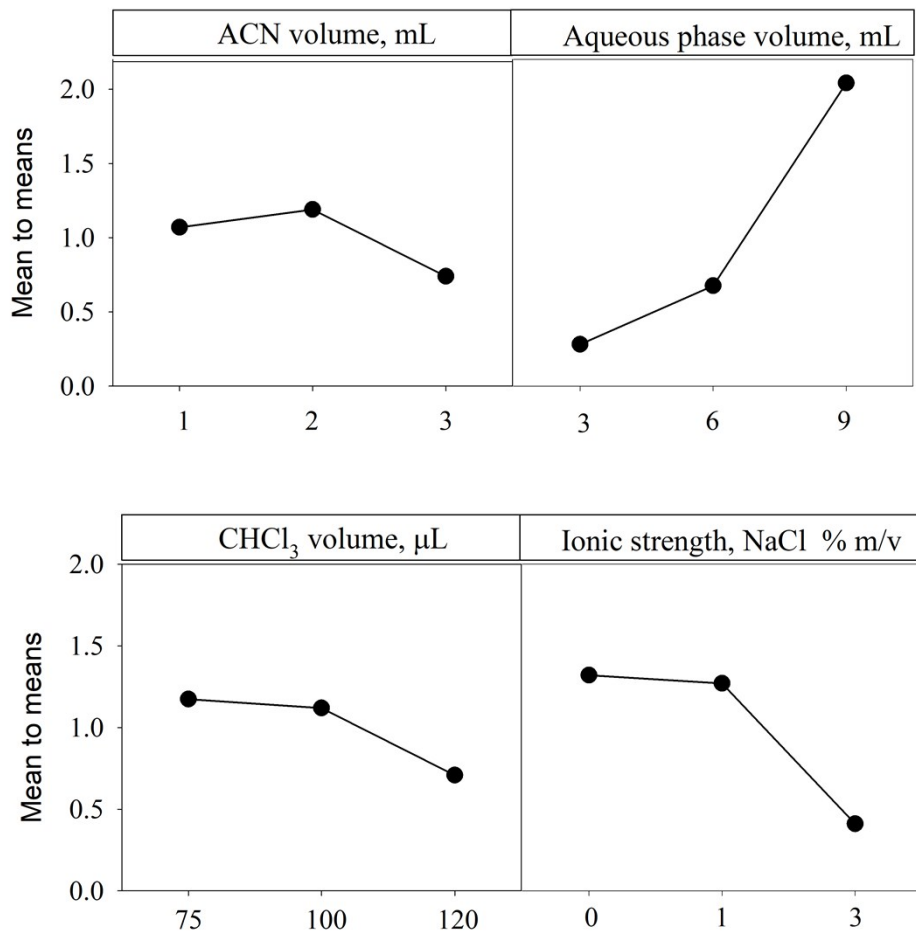

**Fig. ESI3** Effects of factor levels of the chloroform volume, acetonitrile volume, aqueous phase volume and sodium chloride concentration in the aqueous phase, on the mean relative response for PDS and PTSO obtained from the Taguchi orthogonal design application for the optimization of the DLLME step

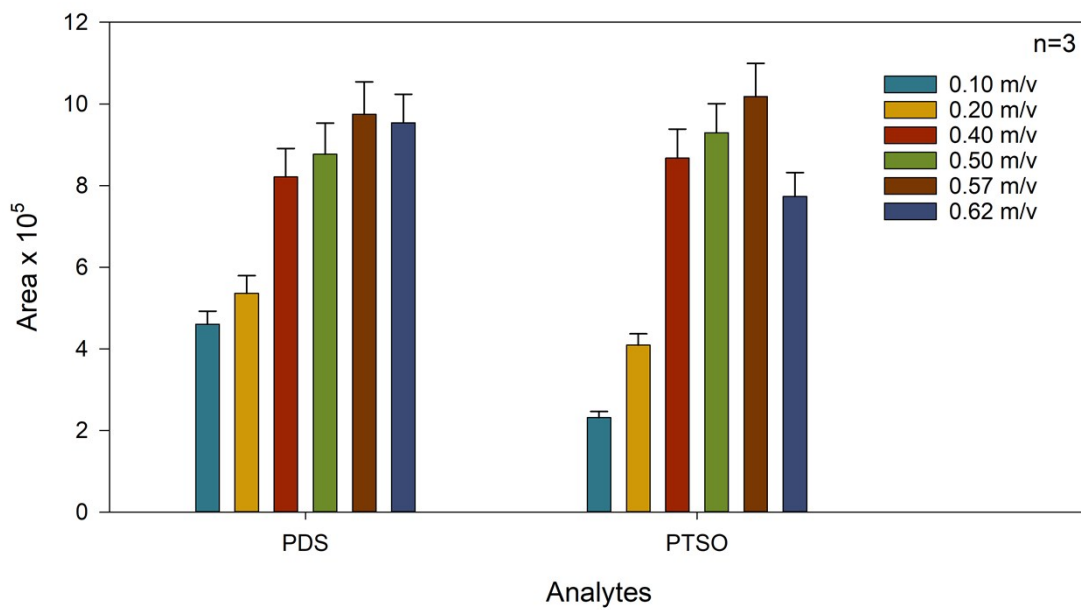

**Fig. ESI4** Optimization of feed mass/acetonitrile volume ratio (m/v) for the extraction of organosulfur compounds from animal feed
